# Supplementary material for: Pedot:PSS/Graphene Oxide (GO) Ternary Nanocomposites for Electrochemical Applications
Source: MDPI journal article supplement (doi:10.3390/molecules28072963), 2023-03-26
Supplement: s1 [file s1]

## SUPPLEMENTARY INFORMATION

# Pedot:PSS/Graphene Oxide (GO) Ternary Nanocomposites for Electrochemical Applications

Giuseppe Greco <sup>1</sup>, Antonella Giuri <sup>2</sup>, Sonia Bagheri <sup>1</sup>, Miriam Seiti <sup>3</sup>, Olivier Degryse <sup>3</sup>, Aurora Rizzo <sup>2</sup>, Claudio Mele <sup>1</sup>, Eleonora Ferraris <sup>3</sup>, Carola Esposito Corcione <sup>1\*</sup>

<sup>1</sup> Department of Engineering for Innovation, University of Salento, Edificio P, Campus Ecotekne, s.p. 6 Lecce-Monteroni, 73100 Lecce, Italy

<sup>2</sup> CNR-NANOTEC-Istituto di Nanotecnologia, Polo di Nanotecnologia, c/o Campus Ecotekne, via Monteroni, I-73100 Lecce, Italy

<sup>3</sup> Department of Mechanical Engineering, Katholieke Universiteit Leuven, 2860 Sint-Katelijne Waver, Belgium

\* Correspondence: carola.corcione@unisalento.it;

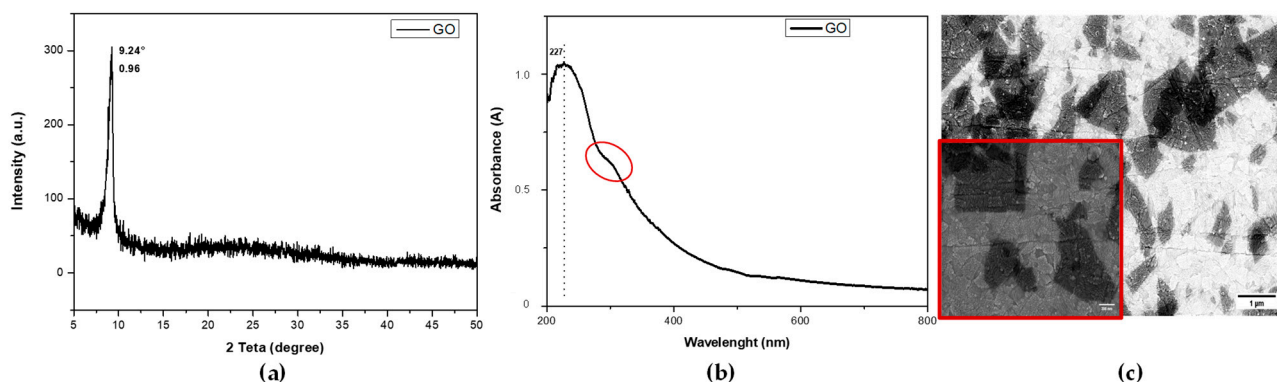

**Figure S1** (a) GO diffraction XRD patterns collected in  $\theta$ - $2\theta$  scan mode drop-casted on glass, (b) UV-vis absorption spectrum of GO drop-casted onto quartz substrate, (c) SEM analysis of GO film spin-coated onto ITO substrate at two different magnifications (scale bar 1  $\mu\text{m}$  and 300 nm).

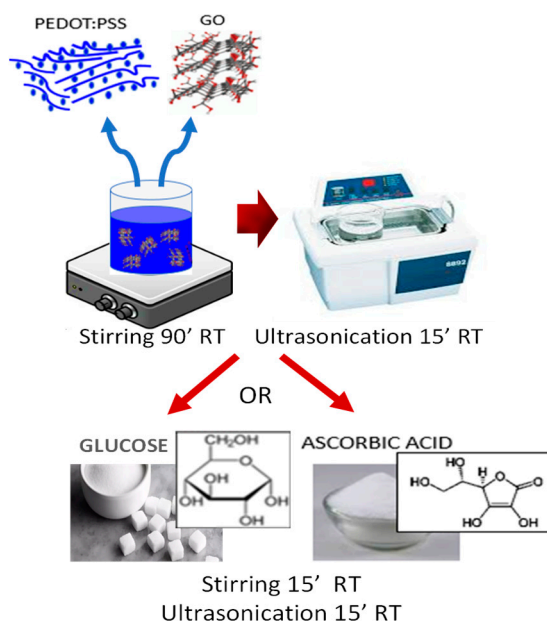

**Figure S2:** Schematic view of inks preparation process.
